# Supplementary material for: Highly sensitive and selective detection of cadmium with a graphite carbon nitride nanosheets/Nafion electrode
Source: Royal Society of Chemistry journal article supplement (doi:10.1039/c6ra24638a), 2016-01-01
Supplement: c6ra24638a1.pdf [file c6ra24638a1.pdf]

## ***Supporting informations***

### **Highly sensitive and selective detection of cadmium with a graphite carbon nitride nanosheets/Nafion electrode**

Wenyu Gao,<sup>a,♀</sup> Xiaofang Wang,<sup>a,♀</sup> Pei Li,<sup>a</sup> Qiongtao Wu,<sup>b</sup> Songmei Wu,<sup>a</sup> Yu Yu,<sup>a\*</sup>  
Kejian Ding<sup>a\*</sup>

<sup>a</sup> *College of Life sciences and Bioengineering, School of Science, Beijing Jiaotong University, Beijing 100044, P R China*

<sup>b</sup> *School of Materials Science and Engineering, Beijing University of Aeronautics and Astronautics, Beijing 100191, P R China*

\* Prof. Kejian Ding, email: [dkjian@bjtu.edu.cn](mailto:dkjian@bjtu.edu.cn) and \* Dr. Yu Yu, email: [yuyu@bjtu.edu.cn](mailto:yuyu@bjtu.edu.cn).

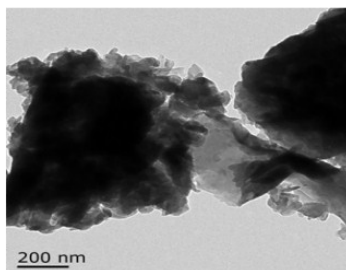

**Figure S1.** TEM image of bulk g-C<sub>3</sub>N<sub>4</sub>

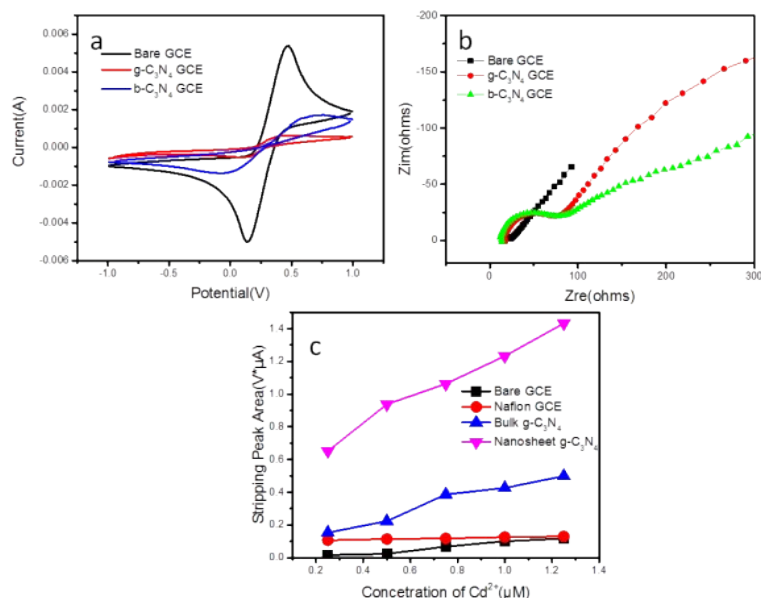

**Figure S2.** (a) cyclic voltammograms (CV) and (b) electrochemical impedance spectroscopy (EIS) of bare/GCE, g-C<sub>3</sub>N<sub>4</sub> nanosheets/GCE, bulk g-C<sub>3</sub>N<sub>4</sub>/GCE in 50 mM electrolyte solution (pH 5.8). (c) The detection of Cd<sup>2+</sup> on bare GCE, Nafion/GCE, bulk g-C<sub>3</sub>N<sub>4</sub>/GCE and nanosheets g-C<sub>3</sub>N<sub>4</sub>/GCE (the concentrations are 0.25, 0.5, 0.75, 1, and 1.25 μM.)

**Table. S1.** Comparison of analytical performance of g-C<sub>3</sub>N<sub>4</sub> sensor with other published sensors for Cd<sup>2+</sup>

| Electrodes                                  | Approaches | Linear range        | Detection limitation | References |
|---------------------------------------------|------------|---------------------|----------------------|------------|
| Acetylene black/CPE                         | ASV        | 58 nM to 2 μM       | 20 nM                | [1]        |
| Benzoic acid-modified GCE                   | SWASV      | 4.48 nM to 0.448 μM | 0.116 μM             | [2]        |
| Ag Nanonuts/GCE                             | DPASV      | 4.48 nM to 0.08 μM  | 0.89 nM              | [3]        |
| Fe <sub>3</sub> O <sub>4</sub> /GCE         | SWASV      | -                   | 0.056 nM             | [4]        |
| ILs/SBA/CPE                                 | DPASV      | 0.6 μM to 30 μM     | 0.08 μM              | [5]        |
| SWNTs/Nafion/GCE                            | ASV        | 40 nM to 4 μM       | 4 nM                 | [6]        |
| g-C <sub>3</sub> N <sub>4</sub> /Nafion/GCE | DPASV      | 1 nM to 100 μM      | 0.5 nM               | This work  |

- G. Li, C. Wan, Z. Ji, K. Wu, *Sensors Actuat. B Chem.*, 2007, **124**, 1-5.
- L. Fan, J. Chen, S. Zhu, M. Wang, G. Xu, *Electrochem. Commun.*, 2009, **11**, 1823-1825.
- S. Prakash, V.K. Shahi, *Anal. Meth.*, 2011, **3**, 2134.
- Y.-F. Sun, W.-K. Chen, W.-J. Li, T.-J. Jiang, J.-H. Liu, Z.-G. Liu, *J. Electroanal. Chem.*, 2014, **714**, 97-102.
- P. Zhang, S. Dong, G. Gu, T. Huang, *B. Korean Chem. Soc.*, 2010, **31**, 2949-2954.
- D. Sun, X. Xie, Y. Cai, H. Zhang, K. Wu, *Anal. Chim. Acta*, 2007, **581**, 27-31.
